# Supplementary material
Source: publisher figshare collection journal article supplement (https://asha.figshare.com/articles/dataset/_/17774819)
Supplement: Supplementary file 1 [file 1]

## **Supplemental Material S2. Community/Patient Engagement Studio facilitation guide.**

### Early Interventions for Children with Language Delays for Families Living in Rural Communities

- [Clinician-Investigator], Ph.D., CCC-SLP
- November 10, 2020
- 1:00-3:00PM on ZOOM

Goal 1: Introduce the project to develop a baseline understanding amongst the group, uncover individual experiences and initial impressions/buy in to the need and solution.

#### **1:00-1:10 Introduction to CES**

PPT slides 1-4:

- o Expectations for the next 2 hours
- o communication norms & format
- o Roles

#### Agenda

- o 1:00-1:10pm: Introduction to today's Community Engagement Studio
- o 1:10-1:30pm: Project Introduction & participant experiences
- o 1:30-2:50pm: Intervention Details & Feedback
- o 2:50-3:00pm: Evaluation and wrap up

#### Introductions

- o [CES Lead], Facilitator, OHSU Community Research Program
- o [Clinician-Investigator], Ph.D., CCC-SLP
- o [CES Scribe], Note taker, OHSU Community Research Liaison
- o [CES Team Member], Support, OHSU OCTRI

#### **1:10-1:30 Project introduction & participant experiences**

PPT slides 5-8: Overview

PPT slides 9-11: Discussion Questions

Slide 9:

1. Do you have any questions for [Clinician-Investigator] about what she presented and overall, what she hopes to accomplish with this work?
  - o How families and communities may benefit?
  - o What issues hoping to address?
  - o Why telehealth & how it works?
  - o Desired outcomes?

Slide 10:

2. What are your experiences with early intervention?
  - o What prompted you to access services?
  - o What did this look like for your family?
  - o If you haven't received services, what would you hope for?
  - o Has COVID19 been a factor?

Slide 11:

3. What is your initial impression and/or level interest of using telehealth for early interventions?
  - o What would you hope for in an outcome?
  - o Best case scenario
  - o Why, why not?
  - o Any immediate concerns?
  - o What else would you need to know

Goal 2: Discuss and gather specific feedback on intervention and establish needs and preferences of families with children with language impairments living in rural communities.

### **1:30-2:50pm: Intervention Details & Feedback**

PPT slides 12-13 + Videos

PPT slides 14-17 are hidden

Slide 18: Discussion Question

1. What are your thoughts on what [Clinician-Investigator] described and what you just watched on the video?
  - o How does this differ from what you are receiving now?
  - o Can you picture yourself and your family in this style of intervention?

Slide 19: Session Frequency and Duration

Slide 20: Discussion Question

2. Previous research suggests that meeting twice weekly for 50 minutes at a time made an Impact on the caregiver's ability to use language support strategies. Best outcomes occur when we work with families 1-2x per week (1 hour session) = 2 total hours per week
  - o Uncover can be adapted to or optimized to fit a family's needs?
  - o Do you think this would work for your family or community?
  - o Why? Why Not?
  - o What are the challenges you may have?

Slide 21: Additional Intervention & Supports

Slide 22: Discussion Question

3. As [Clinician-Investigator] described the different resources to support families receiving services.
  - o Are there are that stand out to you as something you feel you would use and work well for you and your family?
  - o Any that you'd never use?
  - o Why?

Slide 23: Receiving and Giving Feedback

Slide 24: Discussion Question

4. Feedback to parents is essential to success of this intervention.
  - o How do you and your family like to receive feedback?
  - o Do any of the methods [Clinician-Investigator] described appeal to you, why or why not?

Slide 25: How your input will be used

Slide 26: Thank you and evaluation
