# Supplementary material
Source: publisher figshare collection journal article supplement (https://asha.figshare.com/articles/dataset/_/17774819)
Supplement: Supplementary file 2 [file 1]

**Supplemental Material S1.** Community Engagement Studio fidelity checklist.

| <b>Community Engagement Studio Fidelity Checklist</b><br>OHSU/OCTRI Community Outreach, Research & Engagement      |  |
|--------------------------------------------------------------------------------------------------------------------|--|
| <b>Pre-Planning</b>                                                                                                |  |
| Application/request including brief description of project, population of interest, nature of input needed/problem |  |
| Confirm CES is right approach for researcher’s needs                                                               |  |
| Identify facilitator based on CES possible demographics or focus                                                   |  |
| Set planning meeting and share FAQ and PowerPoint template                                                         |  |
| <b>Planning meeting with researcher/research team</b>                                                              |  |
| PI, community navigator, facilitator attends                                                                       |  |
| Explain CES process                                                                                                |  |
| Review CES ground rules for research team                                                                          |  |
| Clarify focus areas of CES (2-3 max)                                                                               |  |
| Define characteristics of expert panel                                                                             |  |
| Coach effective communication with community experts                                                               |  |
| Provide presentation template and guidelines for completion                                                        |  |
| Identify at least 3 possible dates for CES (consider an evening option)                                            |  |
| <b>CES Team</b>                                                                                                    |  |
| Identify neutral facilitator (community member recommended)                                                        |  |
| Confirm community navigator/manager availability                                                                   |  |
| Identify support staff to help with recruitment, logistics                                                         |  |
| Develop facilitators guide (2-3 main questions plus prompters)                                                     |  |
| Vet researcher presentation                                                                                        |  |
| Researcher and facilitator review final slides and facilitator’s guide                                             |  |
| Create Community Expert Screener (typically through REDCap)                                                        |  |
| Recruit and screen community members for expert panel                                                              |  |
| Create shared spreadsheet to track and coordinate community recruitment contacts                                   |  |

| <b>Community Experts</b>                                                                                                                                                                                                                                                                                   |  |
|------------------------------------------------------------------------------------------------------------------------------------------------------------------------------------------------------------------------------------------------------------------------------------------------------------|--|
| Ensure no relationship with researcher/research team (e.g., patients, research participants) and representative of population of interest or provider to population                                                                                                                                        |  |
| Provide orientation if new to CES and explain compensation                                                                                                                                                                                                                                                 |  |
| Provide study materials to community experts for review in advance if needed                                                                                                                                                                                                                               |  |
| Review compensation expectations (e.g., length of time to receive compensation, type of gift card, if social security numbers required)                                                                                                                                                                    |  |
| <b>Logistics</b>                                                                                                                                                                                                                                                                                           |  |
| Poll experts for optimal date and location                                                                                                                                                                                                                                                                 |  |
| Secure meeting room at location with convenient parking and/or transit options                                                                                                                                                                                                                             |  |
| Ensure access to computer, projector and power cords                                                                                                                                                                                                                                                       |  |
| Ensure digital access to presentation (thumb drive, internet)                                                                                                                                                                                                                                              |  |
| Order food - accommodate dietary restrictions/needs. Researchers eat alongside Studio experts                                                                                                                                                                                                              |  |
| Print forms - sign in sheet, paperwork for expert payment, evaluation surveys, expert comment form                                                                                                                                                                                                         |  |
| If needed, print research materials for review (flyers, brochures, surveys)                                                                                                                                                                                                                                |  |
| Gather supplies (markers, pens, flip charts, name tents)                                                                                                                                                                                                                                                   |  |
| Gift cards for payment if used                                                                                                                                                                                                                                                                             |  |
| Confirm time and location with researcher and experts, including any relevant instructions to the Studio (e.g., parking, how to find room, contact if lost)                                                                                                                                                |  |
| <b>Studio</b>                                                                                                                                                                                                                                                                                              |  |
| CES team present                                                                                                                                                                                                                                                                                           |  |
| No more than 2 members of research team in attendance                                                                                                                                                                                                                                                      |  |
| 8-10 member expert panel                                                                                                                                                                                                                                                                                   |  |
| Welcome, introductions                                                                                                                                                                                                                                                                                     |  |
| Review process and ground rules <ul style="list-style-type: none"> <li>a. First names, everyone sit at table, no wrong answers, different opinions are encouraged, everyone on panel participates, do not talk over others</li> <li>b. Housekeeping location of bathrooms, turn off cell phones</li> </ul> |  |
| 10-minute presentation by PI, followed by very brief Q & A for clarification                                                                                                                                                                                                                               |  |
| Facilitator uses facilitation guide to direct conversation                                                                                                                                                                                                                                                 |  |
| Facilitation techniques used to balance power, include all voices, empower experts, validate experts' comments, stay on focus                                                                                                                                                                              |  |

|                                                                                                                                     |  |
|-------------------------------------------------------------------------------------------------------------------------------------|--|
| Navigator takes notes on flip charts, visible to all                                                                                |  |
| Facilitator reviews expert responses, recommendations for affirmation, validation                                                   |  |
| Experts complete written comments form                                                                                              |  |
| Experts complete application to be included in database for future CES                                                              |  |
| Evaluations completed by researcher and experts                                                                                     |  |
| Handout gift cards or complete paperwork for expert compensation                                                                    |  |
| <b>Follow Up</b>                                                                                                                    |  |
| Send "Thank you" to experts                                                                                                         |  |
| Make sure payment is sent to experts in timely manner if gift cards are not used                                                    |  |
| Type up summary for researcher (expert comments plus specific recommendations)                                                      |  |
| Contact researcher if additional info or assistance with recommendations are needed                                                 |  |
| Report back to experts on actions/changes mad as a result of their input (may take 3-6 months or more, depending on project)        |  |
| <b>Facilitation</b>                                                                                                                 |  |
| Use opener to engage each expert at the beginning by going around the room -<br>"What are your initial thoughts about the project?" |  |
| Call each person by their name to establish rapport as opposed to general use of "you"                                              |  |
| Don't ask yes or no questions                                                                                                       |  |
| Ask experts to elaborate on short answers. Avoid interjecting personal experience and opinions                                      |  |
| Use body positioning to redirect conversation or address dominate experts                                                           |  |
| Limit researcher/staff commentary                                                                                                   |  |
| Refocus experts as needed by restating/rewording question                                                                           |  |
| Create "parking lot" for issues that are not specific to discussion                                                                 |  |
| Give time reminders to move along discussion as needed                                                                              |  |
| Be comfortable with silence to give experts time to think and respond                                                               |  |
| <b>Follow Up</b>                                                                                                                    |  |
| Send "Thank you" to experts                                                                                                         |  |
| Make sure payment is sent to experts in timely manner if gift cards are not used                                                    |  |
| Type up summary for researcher (expert comments plus specific recommendations)                                                      |  |
| Contact researcher if additional info or assistance with recommendations are needed                                                 |  |

|                                                                                                                              |  |
|------------------------------------------------------------------------------------------------------------------------------|--|
| Report back to experts on actions/changes mad as a result of their input (may take 3-6 months or more, depending on project) |  |
| <b>Recordkeeping</b>                                                                                                         |  |
| Enter new community experts in expert data base                                                                              |  |
| Enter evaluation surveys in database                                                                                         |  |
| Update CES Record database                                                                                                   |  |
